# Supplementary material for: Chemical contribution to future tropical ozone change in the lower stratosphere
Source: Copernicus journal article supplement (doi:10.5194/acp-14-2959-2014), 2014-03-25
Supplement: Supplementary file 1 [file acp-14-2959-2014-supplement.zip]

Archive with 9 entries (8 files):
- strato3bud/
- strato3bud/strato3bud.f90
- strato3bud/eqn2f90.tcsh
- strato3bud/Makefile.m
- strato3bud/readData.f90
- strato3bud/writeData.f90
- strato3bud/strato3bud.tcsh
- strato3bud/Documentation.pdf
- strato3bud/main.mk
